# Supplementary material for: Cloning and Comparative Analyses of the Zebrafish Ugt Repertoire Reveal Its Evolutionary Diversity
Source: PubMed Central journal article supplement (PMC2819257; doi:10.1371/journal.pone.0009144), 2010-02-10
Supplement: pone.0009144.s003.pdf [file pone.0009144.s003.pdf]

```

                                     : * : * . * : . * :
x1a1 -----MRLLCLEYSVYRVFALLFLGRVQLIEAEKLLAIPLDGGSHWLSMRILVBSLQQRGNQVVVLAPHSNIIHHP--E 73
x1a3 -----MELLASSNAAV--LLFCLGALSVEGGKLLVVPMDGSHWLSMSSVVERLAQNGHEIIVVKPESIVKFD--N 70
x1a4 -----MELLASSNAAV--LLFCLGALSVEGGKLLVVPMDGSHWLSMSSVVERLAQNGHEIIVVKPESIVKFD--N 70
x1a5 -----MGATGSSPSCCFR-RFFILLALGCADGGRLLVVPDGGSHWLSMRVLVDRLAQNGHEIIVVAIPVNMFFNDL--D 72
x1a6 -----MGATGSSPSCCFR-RFFILLALGCADGGRLLVVPDGGSHWLSMRVLVDRLAQNGHEIIVVAIPVNMFFNDL--D 72
x1a2 -----MPLFLLLVGF--VVCLLELPGLSEGGKLVLPDNTNVWLDMHSVMNKLKKNGHEIIVVVIKNNDI--E 70
11a1 -----MLQSVQCIPSWILLFFSWSLSDGGKLVIPADGGSHWLSLKPVMENLQQRGHELVVVAPEANLWIKAS--E 69
11a2 -----MA-CLKRSRSHAVGITCLLSFCHLAESGGKLLVVPDGGSHWLSMKMALEELAQRGHEVVVLMPENTFLMQTS--E 71
zfla1 -----MVF-PKPGFLFLASWAVFFLLLTSGEGKLLVVPDGGSHWLSMHPVVEKLRDKGHEIIVVVAPEINLRIHS--P 72
zfla2 -----MTV-MWRHHVHAG--LVFFLAFWSLAHGGKLLVVPDGGSHWLSMRVLEKLEWEKGHEIVAVVPAALLLKS--Q 70
11a3 -----MAL-PLP-LCSLVLWAFSLLISSPADAGKLLVLPMDGSHWLSMSKVLKLSLKGHEIIVVLPVETSLLKLD--L 70
11a4 -----MAPVVFYSNVILLLLASLNLAGGKLLVVPMDGSHWLSMKPVKQLRQNGHEMVIAPVSIHIKPE--D 68
11a5 -----MAPVVFYSNVILLLLASLNLAGGKLLVVPMDGSHWLSMKPMLKQLRQNGHEMVIAPVNMHIKPE--D 68
zfla3 -----MAL-ELRASPPVV--LLLLSLLGLAAGKLLVVPDGGSHWLSMQLLVLLQKGEVVVVAPEVSLHIKPS--K 69
zfla7 -----MAL-GLRASPPVG--LLLLSLLGLAAGKLLVLPADGGSHWLSMRELLDLLQKGEVVVVAPEVTLHIKPS--K 69
zfla8 -----MAL-GLRASPPVV--LLLLSLLGLAAGKLLVVPDGGSHWLSMREVVDLLRQNGHEVVVVAPEVTLHIKPS--K 69
h1a1 -----MAVESQGRP-LVGLLCLVLPVSHAGKLLVVPDGGSHWLSMLGATQQLQQRGHEIIVVLPADASLYIRD--A 72
h1a3 -----MATGLQVPLPWLATGLLLLSVQPAESGKVLVVPDGGSHWLSMREVLRELHARGHQAVALTPVNMHIKPE--N 73
h1a4 -----MARGLQVPLPQLATGLLLLSVQPAESGKVLVVPDGGSHWLSMREALRELHARGHQAVALTPVNMHIKPE--N 73
h1a5 -----MATGLQVPLPQLATGLLLLSVQPAESGKVLVVPDGGSHWLSMREALRDHARGHQAVALTPVNMHIKPE--N 73
zfla10 -----MAL-FYQAWILL--LLTSL-ILAEGGKLLVVPDGGSHWLSMRPVVEKLLQKGEVVVVPSTSLYMKSKPQ 70
h1a6 -----MAC-LLRSFQRISAGVFFLALWG-MVVDKLLVVPDGGSHWLSMKDIVEVLSDRGHEIIVVVPVPEVSLYMKSKPQ 71
11a6 -----MDH-HFTCPRGFPICFLFLFAIICFEGKRLVVPDGGSHWLSMRAVLEKLERGHEVVVLPVPEVNLLIKES--K 72
11a7 -----MAF-ACHRPTSNPVFLALALAFASVDEKLLVVPDGGSHWLSMRAVVEKLEKGEIIVVVPVPEVNLLIKES--R 72
zfla11 -----MAL-RLCCAWISI--LLLLP--SLSDGGKLLVVPDGGSHWLSMGEVVEKLSERGHEVVVLPVPSWQMETI--Q 67
h1a9 -----MAC-TGWTSF-LPLCVCLLTCG-FAEAGKLLVVPDGGSHWFTMRSVVEKLLRGEHEVVVMPVPSWQLGRS--L 70
h1a7 -----MAR-AGWTGL-LPLVCLLTCG-FAKAGKLLVVPDGGSHWFTMQSVVEKLLRGEHEVVVMPVPSWQLGRS--L 70
h1a10 -----MAR-AGWTSP-VPLCVCLLTCG-FAEAGKLLVVPDGGSHWFTMQSVVEKLLRGEHEVVVMPVPSWQLGRS--L 70
h1a8 -----MAR-TGWTSF-IPLCVSLLTTCG-FAEAGKLLVVPDGGSHWFTMQSVVEKLLRGEHEVVVMPVPSWQLGRS--L 70
z1a1 -----MRTLVPVPAQGLLTLCLFSFESVQA--GKVLVLPDGGSHWLSMKILVEELSRRGHEMVLVPEVTSILIKKS--G 70
z1a3 -----MKRTLFPVPAFLGFLFCLFSESVA--GKVLVMPDGGSHWLSMKILVEEMSRRGHEMVLVPEVTSILIKKS--G 71
z1b1 -----MLKKGWLWGLGSGLLLLWLAGLRPVQG--GRVLVMPVGGSHWLSMKVLATELARRGDVVLVPEKNLIIQS--E 73
mla1 -----MGVRGWFFTAGLLAWLCCSLGPPVQG--GKVLVMPDGGSHWLSMKILVKELSRRGHEVTVLVPESLLIKKS--K 71
sla1 -----MSGEVWFPAALGLVWLCCSLGPAQG--GKVLVVPDGGSHWLSMKILVKELSRRGHEAVVLPVETSLLIHGS--K 71
fla1 -----MRGSGWFFTLGLLAWFCCFPVPEA--GKVLVLPDGGSHWLSMKILVKELVQRGHDVVLVPEVTSLLIKS--E 71
t1a1 -----MRGSGVILILGLLAWISCFGRPVQA--GKVLVLPDGGSPWLSMKILMKKLIQRGHDVVLVPEVTSLLIKS--E 71
z1a2 -----MACLWLLGSLLLGSAEA--GKLLVVPDGGSHWLGKPIVEELGRRGNQVVVVIPEASLSMGP--E 63
z1a4 -----MACSWLLVGLFLGSAEA--GKLLVIPSDDGGSHWLGMPVVEELGRRGNQVVVVIPEASLSMGP--E 63
z1a5 -----MASVLLFCLFLASAKA--GKILVVPDGGSHWTKIKPLVEELGRRGNQVVVVIPEASLSMGP--Q 62
z1a6 -----MAAFVLLLYLFLCLATAEA--GKILVVPDGGSHWTKMKPLVEELGRRGNQVVVVIPEASLSMGP--Q 63
z1a7 -----MNDRIVRMAASALVLCFLCLVSAEA--GNLLVVPALGSHWTKTRPLVEELGRRGNRQVVVVIPEENVMVPA--K 70
z1b2 -----MRLGVIFILVVGVCSSAAVDQKPSRKS-SWTGKLLVVPDGGSHWTKVKAABEEMGRRGHTVIVVVIPEISVLLGPG--Q 75
z1b3 -----MHLGVIFCLVVGVCSSAAVDQKLSRKS-SWTGKLLVVPDGGSHWTKVKAABEEMGRRGHTVIVVVIPEISMRLLGPG--K 75
z1b4 -----MHLGVIIICLVVGVCSSAVDQKLSRNS-SWTGKLLVVPDGGSHWTKVKAABEEMGRRGHTVIVVVIPEISMRLLGPG--K 75
z1b5 -----MH-GVIFNLVVGVCSSAAMNQKPSRNS-SWTGKLLVVPDGGSHWTKVKAABEEMGRRGHTVIVVVIPEISMRLLGPG--K 74
z1b7 -----MGLVAFIWCIVLTFASAGEAVK-SKEASWTGSLVVPDGGSHWTKVKAABEEMGRRGHTVIVVVIPEVSVLLGPG--K 74
flb1 -----MRSAAALLVIMLLSMOVKGAVDKTAGPVGGGNQRPEEIKGTINTAND-SDPFLGNLLVVPMDGSHWVDLKALAEEMGRRGHRVTVVIPEVSMRMPG--K 97
flb2 -----MRSAAALLVIMLLSMOVKGAVDKTAGPVGGGNQRPEEIKGTINTAND-SDPFLGNLLVVPMDGSHWVDLKALAEEMGRRGHRVTVVIPEVSMRMPG--K 97
t1b1 -----MRSATLFTVLLLSLOVKGGRV-TENSAGKGNQRPEE--ETPAND-SDAPFLGNLLVVPMDGSHWVDLKALAEELGRRGHRVTVVIPEFSIRMGP--K 93
s1b1 -----MQVNGAAGEAGGSVAGGPPETKKAABEAANTIPASDT-APAGFLGNLLVVPMDGSHWVGKAIABEEMGRRGHTVIVVVIPEISVRMGP--K 91
mlb1 -----MKLLFVLLLSMSVG--VRGAASVAD--DPRPEKTEKTKVSAEFGSSAAFSGKLLVVPMDGSHWVGKAIABEEMGRRGHRVTVVIPEVSMRMPG--K 92
mlb2 -----MRLLFVLLLSMSVG--VRGVASVAD--EPRPKTEKTKVSAEA--SAAFSGKLLVVPMDGSHWVGKAIABEELGRRGHRVTVVIPEVSMRMPG--K 90

```

```

x1a1  NYILRTYVPVPSKELKLEQMVKSANDVFTK--RPLLDKITNMYQRITNVTGIVFSAQHLLHKSKEIMQELQESAFDAALIDPFFPCGMIVAEVHLHLPVSV 171
x1a3  LYTLRNFSIPYSNQDIHERLQQLVGSQFTA--SSLIEMVLNSYNSIMGVQHMINSMCESLLHNKQFIRNLQEKFDVAVLNDPMFPCGVILAEHLGIPSVH 168
x1a4  LYTLRNFSIPYSNQDIHEHLQQFVGSQFSG--SSLIEVVLTAARNLMDVQHMINMCKSLLNQKLIQNLQEKFDVAVLNDPMFPCGVILAEHLGIPSVH 168
x1a5  NYKVKTFSPYSKDVLESRVRHMNLEIFAD--RILDKIKFLYESVSNGTMSVVSACQHFLONSTLIRELEKEHFDAMLTDSVFPCCGEIVAEHLSIPSVS 170
x1a6  NYKVKTFSPYSKDVLESRVRHMNLEIFAD--RILDKIKFLYESVSNGTMSVVSACQHFLONSTLIRELEKEHFDAMLTDSVFPCCGEIVAEHLSIPSVS 170
x1a2  DFIVKTYTVPALDSGFIQYLEPTEP-LFQM--SSFLEAISTEYRRWKYITSVLCNTCQHLLDDLELIRYLERSLFDAAIMDPWFPCGPIVAEHLSLKSIY 167
11a1  AYTMTKTFVAVSHTEYLKAEFQKLGRIFAH--QFPLTKMTESFAKVRNITLTFDNCQQLLYNKELITYLEENQFDVVLMDPVSPPCGQILAEHLSIPSVY 167
11a2  HFTVTRHSPVYQEBLDAHYRSLGTAIFDD--SPFLEKIFLMYINTRITAFYASACRDLLYDKELITFLQSKFDAMFSDPILPCGPIVAEHLSPVY 169
zfla1  IYTLKTYPVSYTKEFVBAEFKEMGHRSFAP--HPFLEKLS---KIANFTSMFLDSCRLLSDKELIQYLEGSKFDAIFMDPFFPCGQIVAEHLSIPSVY 166
zfla2  SFTIKTYLVPYTOEYVDQYVQKLGNSFET--LTLFLLS---NITELTNMFTSACRHLSDKELMKYLQDSKFDAIMMDPVLPCGPIVAEHLSPVY 164
11a3  SYTTKIYVPHPTQKELHEVYQKFGHSLFSD--EFVVKRVIQIKNLRFINMMYSCHSLHNEEDLMNVVNVSRFDVAVLTAATVPCGSIVSDFQIPVNV 168
11a4  FYTLKTYVPVPTSEEMNENIQSFDHVFED--VPFLVMIATKFLMKKSSAMFLGSCSTHLLYNEELKMYFRNKFDVAVSDPFPWPCGQIVAEVLEIPSVF 166
11a5  LYSKTYVPVPTYEEMDENIQGISEQAFDD--VPFLMIANTIEHMKKTSVFLGSCSTHLLYNEELKMYFRNKFDVAVSDPFPWPCGQIVAEVDFIPSVF 166
zfla3  TIVMKTYPVPTQEBMDKVFKGSVMDLFGK--GFLEERVIRQYQAKKTSALFLATCTHLLYNEELKMYFRNKFDVAVSDPFPWPCGQIVAEVLEIPSVY 167
zfla7  NFVMMKYSVPPTQEBLEKAFQAFHFGSFEE--GWFFKRFKVVYRGMKTLTDCWVTSCEQLLQSKELIRYLEESKFDAILTDPVATCGLILAEHLSLPSMY 167
zfla8  NFVMMKYSVPYTKEDLKEFAFFHFSFEQ--GFPLERLRKAYQGIKRTDFGVTSCEQLLQSKELIRYLEESKFDAILTDPVATCGLILAEHLSLPSMY 167
h1a1  FYTLKTYVPVPTQEBMDKVFKGSVMDLFGK--GFLEERVIRQYQAKKTSALFLATCTHLLYNEELKMYFRNKFDVAVSDPFPWPCGQIVAEVLEIPSVY 170
h1a3  FFTLLTYAISWQDEFDRHVLGHTQLYFET--EHFLKFFRSMAMLNMSLVLRHRCVVELLHNEALIRHLNATSFVAVLTDVNLCAAVLAKYLSIPTVF 171
h1a4  FFTLLTYAVPWTQKFEFDRVLTGYTQGFET--EHLKRYRSMAIMNNSVALHRCVVELLHNEALIRHLNATSFVAVLTDVNLCAAVLAKYLSIPTVF 171
h1a5  FFTLLTYAISWQDEFDRHVLGHTQLYFET--EHLKRYRSMAIMNNSVALHRCVVELLHNEALIRHLNATSFVAVLTDVNLCAAVLAKYLSIPTVF 171
zfla10  NYTKVYVPVPTDEYLGELIKALVNAHFME--QSVLNVVLTLYQVMIEIYPSVFTNCKSLQNEELMQLHKEKSKFDVAVLTDVNLCAAVLAKYLSIPTVF 168
h1a6  YYTRKIYVVPYDQEBLKNRYQSGNHFAB--RSFLTAPOQTEYRNMMIVIGLYFINCQSLQDRDTLNFKESKFDALFTDPALPCGPIVAEHLGIPSVY 169
11a6  YYTMKKYAVPYMDDLLQRFLLGNSPFEE--VSFPAMVIGAYRTLMQILIELNSVSCDNLKKNREVMRYLAENRFDALFTDPAVPCGVILAEVLSVPSLY 170
11a7  HYMLKTYSPVPEQKDLDAQFKKFSFMLFRK--VSFPYSILQEYRNMMYINLFFDNCNSLLKDRVIFLEQGHFDALFTDPALPCGPIVAEHLGIPSVY 170
zfla11  AYKVVTYVPVPTLGELENAFQEVAVHLMQ--KPFPLNALAMYKASVHVFSYFFGQCKDLFHSQETLRFNLQSSFDAILTDPAFMCGAILAEHLSLPSVF 165
h1a9  NCTVKTYSISYLEDLDRFKAFAHAQKAVRSIYSLLMGSSYND---IFDLFFSNCRSLFKDKLVEYLKESSEFDVAVLTDVNLCAAVLAKYLSIPTVF 167
h1a7  NCTVKTYSISYLEDLDRFKAFAHAQKAVRSIYSLLMGSSYND---IFDLFFSNCRSLFKDKLVEYLKESSEFDVAVLTDVNLCAAVLAKYLSIPTVF 167
h1a10  NCTVKTYSISYLEDQNRFMVFAHQKAAQSIYSLLMGSSYND---IFDLFFSNCRSLFKDKLVEYLKESSEFDVAVLTDVNLCAAVLAKYLSIPTVF 167
h1a8  NCTVKTYSISYLEDLDRFKAFAHAQKAVRSIYSLLMGSSYND---IFDLFFSNCRSLFKDKLVEYLKESSEFDVAVLTDVNLCAAVLAKYLSIPTVF 167
z1a1  KYSTKTYVPSFTHDDLAENLKIQNSALEK--APKLTDIVVNRNLQFLTMQSKTCEGLLYNEPLMKSLREMGFDAMLTDPFLPCGPIVAEHLGIPSVY 168
z1a3  NFTTKSFRVPSFDELNAHVHDIRKTAIEK--APRFIDIVGALGNLIQFINMVKACEGLLYDEPLMKSLRDMKFDALLTDPFLPCGSVIADYFSPAVY 169
z1b1  LFRTEFPVKISKEQLSKSLKGFQGGVFRS--PALMD-VFVQLERLLNFTGQVEGCESSLYNEPLMKSLRDMKFDALLTDPFLPCGSVIADYFSPAVY 171
m1a1  DYKTEVHKVPVPTQEBLNGKFDKLRRESVFK--TPEFTDMFVNQRLVEFTTLQVKGCESLLDSEDLMERLRGEGFDAMLTDPFLPCGSILAKMFSIPAVY 169
sl1a1  SYRTEMYQVPTKAELEDAFNQKDGVLK--PPTITDLFINIQRLVNFYSMQVGCESLLYNEPLMKSLRDMKFDALLTDPFLPCGSILSHVFSIPAVY 169
fl1a1  NYRTEIYQVPSKEDLDGNFNEKDGFLDK--PPTIMADIFINVERLVFTTMQVSGCESLLRNQPLMTRLRQEGFEVVLTEPFLPCGSILSHLNFVPAVY 169
tl1a1  NYRTEIYQVPSKEDLDENFKLLKDGVLK--PPSMADVFNVERLMNYTMMQVSGCESLLRNQPLMTRLRQEGFEVVLTEPFLPCGSILSHLNFVPAVY 169
z1a2  KTTLLTYPVNYTKVLEAVLASELNALLSIDISTDLAKFQSFNINMNSLNIIRSABEGFLSNKDLIKLQDYNFVILTDPFETVGVIAAEVLSVPAIY 163
z1a4  KTTLLTYPVNYTKAELHMLVLEGNLTELSTDFSTELSKFFVFLQKLVQNFIVRNAEGLLFNEDLMKKLQDCKFDAILTDPFEPVGVIAEYLSVPAIY 163
z1a5  HTTLLTYPVNYTKAQIQDHSASVTNLIETHVSTDLARFQSFINAMDLLNLIICNVEGLLNKDLKMLKQDYNFVILTDPFELVGVIAAEVLSVPAIY 162
z1a6  HTTLLTYPVNYTKAQIKIYKAGVTTLSTYVSTDLARFQSFINAMDLLNLIIRSABEGFLSNKDLIKLQDYNFVILTDPFETVGVIAAEVLSVPAIY 163
z1a7  HTTLLTYPVNYTKAQIQKDAAIKSLFSADVSSDGRFQNFNFTMDMLKVIISRNAEGLLLNKDLKMLKQDYNFVILTDPFETVGVIAEYLSVPAIY 170
z1b2  HYITKMFVSKYDQKSLNKLNVLEVNTPG--NSFLSTVIRIVSNLRRMFNMAATSESLFQDKELIESLRNENFDVAVLTDVNLCAAVLAKYLSIPTVF 174
z1b3  HYITKMFVSKYDQKSLNKLNVLEVNTPG--NSFLSTVIRIVSNLRRMFNMAATSESLFQDKELIESLRNENFDVAVLTDVNLCAAVLAKYLSIPTVF 174
z1b4  HYITKMFVSKYDQKSLNKLNVLEVNTPG--NSFLSTVIRIVSNLRRMFNMAATSESLFQDKELIESLRNENFDVAVLTDVNLCAAVLAKYLSIPTVF 174
z1b5  HYITKMFVSKYDQKSLNKLNVLEVNTPG--NSFLSTVIRIVSNLRRMFNMAATSESLFQDKELIESLRNENFDVAVLTDVNLCAAVLAKYLSIPTVF 173
z1b7  HYVTRTFPVLYGKQDLDELQARNAQVMESKQ--LPLMEKISTRFNSMRKFNVLQRATAESLLNQLBELVDFLRKQNFDAVLTSPAVPTGAILAYNLSVPAVY 173
flb1  YYDTVTFPVYDKDLVA-SLMGDNKGILEKSVGFEKIQRNISQFQTFASFLHTTAESLLFNASISQLEQNFDAVLTDPMPVPTGAILARKLGLPIVN 196
flb2  YYDTVTFPVYDKAVID-SIMVANKDVIKKSVSFMKIQKQFTQFKIKGLHSTAESLLFNASISQLEQNFDAVLTDPMPVPTGAILARKLGLPIVN 196
tlb1  YYDTVTFPVYQADID-SIIAANKDVLEKLSLFDKISKRFNQFRKIASFLHSTAESLLFNASISQLEQNFDAVLTDPMPVPTGAILARKLGLPIVN 192
slb1  HYETVTFPVYDKAHL--FVMAVHKDVLKRSQSFQIKAKYISQIMRITGFIHTTAESLLFNDSLSHLAGQNFDAVLTDPMPVPTGAILARKLGLPIVN 190
mlb1  HYDTLTHPVYQADID-VMVSMHGSVMR-SDFPMERMKTKFHHIKRVIDFHVHTAESLLFNDSFISYLEQEFDAVLTDPVIPSGLIARKLGLPIVN 190
mlb2  HYDTLTHPVYQGSVEVD-AILSLQKDFLE-TAQPFMERIETKYHNFVRMNFHVHTAESLLFNDSFISYLEQEFDAVLTDPMPVPTGAILARKLGLPIVN 188

```

```

* : :* . . : : .* : : : * : *
x1a1 LLYGLPCGIDRLATOCPSPLSYVPRHFTGNTDHSFQRLKNALLVPVDIFLCNLLYSYQAQLASEFLHREMTILQLYSQTSVWLMKTDVFDYPRPLMP 271
x1a3 FLRGLPCMYDYISAACDSPLSYVPRHFTQNSDKMNFQRVGNLTLRLSLAEPILCGAAFRGWHEHLASEFLQREVTAIQLLSRTSVWLMRVDFVFDHPRPVM 268
x1a4 FLREVPQCMYDYISAACDSPLSYVPRHFTQNSDKMNFQRVGNLTLRLSLAEPILCGAAFRGWHEHLASEFLQREVTAIQLLSRTSVWLMRVDFVFDYPRPVM 268
x1a5 FTRGAAFMGDQIGSOTPSPPSYVPRMFTVYTDNMSFSORVKNFLIHSLEHIVCHIFYPYAQMADFLKKEVTAMSLFSRTSIWLMRYDFVFEFPRPIMP 270
x1a6 FMRGTFIFMGDQIASOTPSPPSYVPRMFTVYTDNMSFSORVKNFLIHSLEHIVCHIFYPYAQMADFLKKEVTAMSLFSRTSIWLMRYDFVFEFPRPIMP 270
x1a2 VMPGFSCGWYTTATQCP-----KSPYQHYGQMDFTORMKSLLAESLEYIACQEIKAETRLASQFLHKKHINILQVFSQAELWLFYDFVVEAKPVMP 260
11a1 YLRGIPCGLDFEASQCPNPHSYVPRFFTRNTDRMVFNQRVKNFLVGSLEFIIICYLLYSPYEVLSKFLORDMITELYSQASIWLLRYDFVFEYPRPVM 267
11a2 FLRGLPCGLDYKAAQCPVPLSYVWGFTRFSDHMSFIERVKNLITSPLOYQLLQRLFFANHEELASEFLQRTTISELFSKTSIWLMRYDFVFEYPRPVM 269
zfla1 FLRGLPCSLFQAMMCPSPPSYVPRFFTRSDRMSFQWRLGNFLATMGSSSLACSVLYSPYDPLIQEFLOREAVPELFSHAAVWLMKYDFVFEYPRPVM 266
zfla2 FMRGLPCTLDYKAAQSPSPSYVPRVFTLSLSDHMTFPERVKNFLIGLEPPLLCHFLVLYKESLASEFLQRDVITQELFSQASVWLMRYDFVFEYPRPIMP 264
11a3 FLRGIACNLLDKAAQCPSPSYVPRMFTVYTDNMTFLQRVANMLIRSMDFLLCKVYVYQFDLASEFLHKKDVTLLDLFSKSPVWLLRYDFVFEYPRPVM 268
11a4 FLRGLPCGYEFEATOCPRPPSYVPRGFTRYSDHMTFQORVKNMLFHTEFFLCSVYTPYAKLASEFLQREMTFVFLVSNQSVWLLIREDLAFYTPKPLMP 266
11a5 FLRGLPCGYEFEATOCPRPPSYVPRALTRYSDHMTFQORVKNMLFHLTEFFLCSVYTPYAKLASEFLQREMTFVFLVSNQSVWLLIREDLAFYTPKPLMP 266
zfla3 FLQQIPCGLEYQATQCPNPPSYVPRVFTLTDHMTFQORVKNMLYDIPNFFLQDVVYQPYAELASEFFKQEVVTPDLLRQASVWLMKDFVLFHFPPKPLMP 267
zfla7 FLRGLVPCGLDLDRLCPSPPSYVPRVFTLTDHMTFQORVKNMLFEIPNVFLCDFAFQPYSKLASEFLQREVTVQDLLRKSQVWLLRLDFVLDYPRPVM 267
zfla8 FLRGLHCGLDFEATOCPRPPSYVPRGFTRYSDHMTFQORVKNMLYDIPNFFLQDVVYQPYAELASEFFKQEVVTPDLLRQASVWLLRLDFVLDYPRPVM 267
h1a1 FLHALPCSLFQAMMCPSPPSYVPRPLFSHSDHMTFQORVKNMLIAFQNFCLQDVVYQPYATLASEFLQREVTVQDLLSASVWLMRSDYFKDYPKPLMP 270
h1a3 FLRNLPCDLDFKGTQCPNPPSYVPRLLTNSDHMTFQORVKNMLYPLALSIIYCHAFAPYASLASEFLQREVTVQDLLSASVWLMRSDYFKDYPKPLMP 271
h1a4 FWRYPICDLDFKGTQCPNPPSYVPRLLTNSDHMTFQORVKNMLYPLALSIIYCHAFAPYASLASEFLQREVTVQDLLSASVWLMRSDYFKDYPKPLMP 271
h1a5 FLRNLPCDLDFKGTQCPNPPSYVPRLLTNSDHMTFQORVKNMLYPLALSIIYCHAFAPYASLASEFLQREVTVQDLLSASVWLMRSDYFKDYPKPLMP 271
zfla10 FLRGLPCGMDSAATQCPSPSYVPRLLFDLNTDSMMFSORVKNMLVNLLELFYCKPIYDNFEEELAYKVKKKVATATELLSRGSAVWLMRYDFVFEFPRPVM 268
h1a6 LFRGFPCSLHETFSRSDPVSYPICYKFSRDMTFSORVANFLVNLLEPFLYCYLFSKYEEELASEAVLKRDDVITITLYQKVSVWLLRYDFVLEYPKPLMP 269
11a6 FFRGFPCNLELAVSKCPDPVSYPICYKFSRDMTFSORVANFLVNLLEPFLYCYLFSKYEEELASEAVLKRDDVITITLYQKVSVWLLRYDFVLEYPKPLMP 270
11a7 FFRGFPCSLHETFSRSDPVSYPICYKFSRDMTFSORVANFLVNLLEPFLYCYLFSKYEEELASEAVLKRDDVITITLYQKVSVWLLRYDFVLEYPKPLMP 270
zfla11 FMRGFPCNLDHFAAOCPSPPSYVPRLLFSDHMTFQORVENALILLLELEYCNSFYAEALKSSSEVLQDVSMLDLVNSAAVWLLRDFVFEYPRPVM 265
h1a9 FARGILCHYLEEGAOCAPLSYVPRILLGFSAMTFKERVNHHIMHLEHLLCFYFKNLEIASEILQTPVTAYDLYSHTSIWLLRDFVLDYPRPVM 267
h1a7 FARGIFCHYLEEGAOCAPLSYVPRILLGFSAMTFKERVNHHIMHLEHLLCFYFKNLEIASEILQTPVTAYDLYSHTSIWLLRDFVLDYPRPVM 267
h1a10 FTRGIFCHYLEEGAOCAPLSYVPRNDLLGFSAMTFKERVNHHIMHLEHLLCFYFKNLEIASEILQTPVTAYDLYSHTSIWLLRDFVLDYPRPVM 267
h1a8 FARGIACHYLEEGAOCAPLSYVPRILLGFSAMTFKERVNHHIMHLEHLLCFYFKNLEIASEILQTPVTAYDLYSHTSIWLLRDFVLDYPRPVM 267
z1a1 FLRLIPCRLEDEAAAQCPSPSYVPRVFTLTDHMTFQORVKNMLYPLALSIIYCHAFAPYASLASEAVLKRDDVITITLYQKVSVWLLRYDFVLEYPKPLMP 268
z1a3 FLRGLPCRLDEAAAQCPSPSYVPRVFTLTDHMTFQORVKNMLYPLALSIIYCHAFAPYASLASEAVLKRDDVITITLYQKVSVWLLRYDFVLEYPKPLMP 269
z1b1 FLRGMPCGIDLLASQCPSPSYVPRFHSQTSDKMNFVERIRNFMMSGFELVLCKVMYASFDLAEARYLKKDVTYKEIIRGALWLLRYDFVFEYPRPIMP 271
m1a1 FLRGLPCGLDYKANOCPSPPSYVPRVFTLTDHMTFQORVKNMLYPLALSIIYCHAFAPYASLASEAVLKRDDVITITLYQKVSVWLLRYDFVLEYPKPLMP 269
s1a1 FLRGLPCGLDSTRANHCAPVSYVPRVFTLTDHMTFQORVKNMLYPLALSIIYCHAFAPYASLASEAVLKRDDVITITLYQKVSVWLLRYDFVLEYPKPLMP 269
f1a1 FLRGLPCGLDLKANOCAPPSYVPRVFTLTDHMTFQORVKNMLYPLALSIIYCHAFAPYASLASEAVLKRDDVITITLYQKVSVWLLRYDFVLEYPKPLMP 269
t1a1 FLRGLPCGLDSKANOCAPPSYVPRVFTLTDHMTFQORVKNMLYPLALSIIYCHAFAPYASLASEAVLKRDDVITITLYQKVSVWLLRYDFVLEYPKPLMP 269
z1a2 MQINHPGVDTLASQCPSPSYVPRVFTLTDHMTFQORVKNMLYPLALSIIYCHAFAPYASLASEAVLKRDDVITITLYQKVSVWLLRYDFVLEYPKPLMP 263
z1a4 MQVNLPCGVDLTLASQCPSPSYVPRVFTLTDHMTFQORVKNMLYPLALSIIYCHAFAPYASLASEAVLKRDDVITITLYQKVSVWLLRYDFVLEYPKPLMP 263
z1a5 IQTSHPCGADTLASQCPSPSYVPRVFTLTDHMTFQORVKNMLYPLALSIIYCHAFAPYASLASEAVLKRDDVITITLYQKVSVWLLRYDFVLEYPKPLMP 262
z1a6 IQTSHPCNVDTLASQCPSPSYVPRVFTLTDHMTFQORVKNMLYPLALSIIYCHAFAPYASLASEAVLKRDDVITITLYQKVSVWLLRYDFVLEYPKPLMP 263
z1a7 MQTSHPCGADVTLASQCPSPSYVPRVFTLTDHMTFQORVKNMLYPLALSIIYCHAFAPYASLASEAVLKRDDVITITLYQKVSVWLLRYDFVLEYPKPLMP 270
z1b2 LLRGMACGLDATATQCPNPPSYVPRVFTLTDHMTFQORVKNMLYPLALSIIYCHAFAPYASLASEAVLKRDDVITITLYQKVSVWLLRYDFVLEYPKPLMP 274
z1b3 MLRGMPCALDATATQCPNPPSYVPRVFTLTDHMTFQORVKNMLYPLALSIIYCHAFAPYASLASEAVLKRDDVITITLYQKVSVWLLRYDFVLEYPKPLMP 274
z1b4 MLRGMPC--ESKATACPNPPSYVPRVFTLTDHMTFQORVKNMLYPLALSIIYCHAFAPYASLASEAVLKRDDVITITLYQKVSVWLLRYDFVLEYPKPLMP 272
z1b5 MLRGLMPC--ESKATACDPSPSYVPRVFTLTDHMTFQORVKNMLYPLALSIIYCHAFAPYASLASEAVLKRDDVITITLYQKVSVWLLRYDFVLEYPKPLMP 271
z1b7 MLRGLPCGLDSVATACPNPPSYVPRVFTLTDHMTFQORVKNMLYPLALSIIYCHAFAPYASLASEAVLKRDDVITITLYQKVSVWLLRYDFVLEYPKPLMP 273
f1b1 LLRGLPCMLDMKSAGCPSPPSYVPRVFTLTDHMTFQORVKNMLYPLALSIIYCHAFAPYASLASEAVLKRDDVITITLYQKVSVWLLRYDFVLEYPKPLMP 296
f1b2 LLRGLPCMLDMKSAGCPSPPSYVPRVFTLTDHMTFQORVKNMLYPLALSIIYCHAFAPYASLASEAVLKRDDVITITLYQKVSVWLLRYDFVLEYPKPLMP 296
t1b1 LLRGLPCMLDMKAAGCPSPPSYVPRVFTLTDHMTFQORVKNMLYPLALSIIYCHAFAPYASLASEAVLKRDDVITITLYQKVSVWLLRYDFVLEYPKPLMP 292
s1b1 LLRGLPCSLDMKSAGCPSPPSYVPRVFTLTDHMTFQORVKNMLYPLALSIIYCHAFAPYASLASEAVLKRDDVITITLYQKVSVWLLRYDFVLEYPKPLMP 290
m1b1 LLRGLPCSLDMKAAGCPSPPSYVPRVFTLTDHMTFQORVKNMLYPLALSIIYCHAFAPYASLASEAVLKRDDVITITLYQKVSVWLLRYDFVLEYPKPLMP 290
m1b2 LLRGLPCALDMKAAGCPSPPSYVPRVFTLTDHMTFQORVKNMLYPLALSIIYCHAFAPYASLASEAVLKRDDVITITLYQKVSVWLLRYDFVLEYPKPLMP 288

```





```

: ** : * : * . ** . : * : . *
x1a1 APHLRPAADHLNWFQYYSLDVIGFLLAVLLTALFI SLKCCTFVFRRCFKRNSKKORKSKSQ-- 532
x1a3 APHLRPAADHLNWFQYYSLDVIGFLLAVLLTALFI SLKCCTFVFRRCFKRNSKKORKSKSQ-- 529
x1a4 APHLRPAADHLNWFQYYSLDVIGFLLAVLLTALFI SLKCCTFVFRRCFKRNSKKORKSKSQ-- 529
x1a5 APHLRPAADHLNWIQYQSLDVMAFLLAVLLTALFI SLKCCTFACRCCCKRNTKPKRRTKSE-- 531
x1a6 APHLRPAADHLNWIQYQSLDVMAFLLAVLLTALFI SLKCCTFACRCCCKRNTKPKRRTKSE-- 531
x1a2 APHLRPAADHLNWFQYYSLDVIGFLLAVLLTALFI SLKCCTFVFRRCFKRNSKKORKSKSQ-- 521
11a1 APHLRPAADHLNWFQYYSIDVLAFLAASLLALFI SMKCCMFCCRKCFCKSGRLTKKSKSKSH 530
11a2 APHLRPAADHLNWFQYYSIDVLAFLAASLLALFI SMKCCMFCCRKCFCKSGRLTKKSKSKSH 532
zfla1 APHLRPAADHLNWFQYYSIDVLAFLAASLLALFI SFKCCCLCCCRCCCFCKKGRTGKATKAKSH 529
zfla2 APHLRPAADHLNWFQYYSIDVLAFLAASLLALFI SFKCCCLCCCRCCCFCKKGRTGKATKAKSH 527
11a3 APHLRPAADHLNWFQYYSIDVLAFLAASLLALFI SMKCCMFCCRKCFCKSGRLTKKSKSKSH 531
11a4 APHLRPAADHLNWFQYYSIDVLAFLAASLLALFI SMKCCMFCCRKCFCKSGRLTKKSKSKSH 529
11a5 APHLRPAADHLNWFQYYSIDVLAFLAASLLALFI SMKCCMFCCRKCFCKSGRLTKKSKSKSH 529
zfla3 APHLRPAADHLNWFQYYSIDVLAFLAASLLALFI SFKCCCLCCCRCCCFCKKGRTGKATKAKSH 529
zfla7 APHLRPAADHLNWFQYYSIDVLAFLAASLLALFI SFKCCCLCCCRCCCFCKKGRTGKATKAKSH 529
zfla8 APHLRPAADHLNWFQYYSIDVLAFLAASLLALFI SFKCCCLCCCRCCCFCKKGRTGKATKAKSH 529
h1a1 APHLRPAADHLTWYQYHSLDVIGFLLAVLTVAFI TFKCCAYGYRKCLGKKGRVKKAHKSKTH 533
h1a3 APHLRPAADHLTWYQYHSLDVIGFLLAVLTVAFI TFKCCAYGYRKCLGKKGRVKKAHKSKTH 534
h1a4 APHLRPAADHLTWYQYHSLDVIGFLLAVLTVAFI TFKCCAYGYRKCLGKKGRVKKAHKSKTH 534
h1a5 APHLRPAADHLTWYQYHSLDVIGFLLAVLTVAFI TFKCCAYGYRKCLGKKGRVKKAHKSKTH 534
zfla10 APHLRPAADHLNWFQYYSIDVLAFLAASLLALFI SFKCCCLCCCRCCCFCKKGRTGKATKAKSH 531
h1a6 APHLRPAADHLTWYQYHSLDVIGFLLAVLTVAFI TFKCCAYGYRKCLGKKGRVKKAHKSKTH 532
11a6 APHLRPAADHLNWFQYYSIDVLAFLAASLLALFI SMKCCMFCCRKCFCKSGRLTKKSKSKSH 533
11a7 APHLRPAADHLNWFQYYSIDVLAFLAASLLALFI SMKCCMFCCRKCFCKSGRLTKKSKSKSH 533
zfla11 APHLRPAADHLNWFQYYSIDVLAFLAASLLALFI SFKCCCLCCCRCCCFCKKGRTGKATKAKSH 528
h1a9 APHLRPAADHLTWYQYHSLDVIGFLLAVLTVAFI TFKCCAYGYRKCLGKKGRVKKAHKSKTH 530
h1a7 APHLRPAADHLTWYQYHSLDVIGFLLAVLTVAFI TFKCCAYGYRKCLGKKGRVKKAHKSKTH 530
h1a10 APHLRPAADHLTWYQYHSLDVIGFLLAVLTVAFI TFKCCAYGYRKCLGKKGRVKKAHKSKTH 530
h1a8 APHLRPAADHLTWYQYHSLDVIGFLLAVLTVAFI TFKCCAYGYRKCLGKKGRVKKAHKSKTH 530
z1a1 AEHLRPAADHLNWIQYHSLDVIGFLLILLTVIFVTVKSCMFCFRKCFKKSQKKKKA----- 525
z1a3 AEHLRPAADHLNWIQYHSLDVIGFLLILLTVIFVTVKSCMFCFRKCFKKSQKKKKA----- 526
z1b1 ADHLRPAAEHLNWIQYHSLDVIGFLLILLTVIFVTVKSCMFCFRKCFKKSQKKKKA----- 528
m1a1 ATHLRVAADHLNWFQYHSLDVIGVLAIVVITVLWVTLKCCSFGRKCCGRRSSKSKSE----- 527
sl1a1 AAHLRVAADHLNWIQYHSLDVVFVFAVVLVGLWVTLKGLFCGRKCFRKGTPKRRQA----- 527
fl1a1 AEHLRVAADHLNWFQYHSLDVIGFLAVLLTVLWALLKCCSCCIRRLRTGKSKKKE----- 525
tl1a1 AQHLRVAADHLNWFQYHSLDVIGFLAVLLTVLWVLLKCCSCTRRRLRIGKMKKE----- 525
z1a2 AEHLRPAADHLNWIQYHSLDVIGFLLILLTVIFVTVKSCMFCFRKCFKKSQKKKKA----- 520
z1a4 AEHLRPAADHLNWIQYHSLDVIGFLLILLTVIFVTVKSCMFCFRKCFKKSQKKKKA----- 520
z1a5 AEHLRPAADHLNWIQYHSLDVIGFLLILLTVIFVTVKSCMFCFRKCFKKSQKKKKA----- 519
z1a6 AEHLRPAADHLNWIQYHSLDVIGFLLILLTVIFVTVKSCMFCFRKCFKKSQKKKKA----- 520
z1a7 AEHLRPAADHLNWIQYHSLDVIGFLLILLTVIFVTVKSCMFCFRKCFKKSQKKKKA----- 527
z1b2 ADHLRPAAEHLNWIQYHSLDVIGFLLILLTVIFVTVKSCMFCFRKCFKKSQKKKKA----- 531
z1b3 ADHLRPAAEHLNWIQYHSLDVIGFLLILLTVIFVTVKSCMFCFRKCFKKSQKKKKA----- 531
z1b4 ADHLRPAAEHLNWIQYHSLDVIGFLLILLTVIFVTVKSCMFCFRKCFKKSQKKKKA----- 529
z1b5 ADHLRPAAEHLNWIQYHSLDVIGFLLILLTVIFVTVKSCMFCFRKCFKKSQKKKKA----- 528
z1b7 ADHLRPAAEHLNWIQYHSLDVIGFLLILLTVIFVTVKSCMFCFRKCFKKSQKKKKA----- 530
flb1 AKHLRPAVHDLNWIQYCLDVVAFVFTILLVVVLTVKCLKVFRLKLGKRRKD----- 548
flb2 AKHLRPAVHDLNWIQYCLDVVAFVFTILLVVVLTVKCLKVFRLKLGKRRKD----- 548
tlb1 AKHLRPAVHDLNWIQYCLDVVAFVFTILLVVVLTVKCLKVFRLKLGKRRKD----- 544
slb1 AKHLRPAVHDLNWIQYCLDVVAFVFTILLVVVLTVKCLKVFRLKLGKRRKD----- 542
mlb1 TKHLRPAVHDLNWIQYCLDVVAFVFTILLVVVLTVKCLKVFRLKLGKRRKD----- 542
mlb2 AKHLRPAVHDLNWIQYCLDVVAFVFTILLVVVLTVKCLKVFRLKLGKRRKD----- 540

```
