# Supplementary material for: Cloning and Comparative Analyses of the Zebrafish Ugt Repertoire Reveal Its Evolutionary Diversity
Source: PubMed Central journal article supplement (PMC2819257; doi:10.1371/journal.pone.0009144), 2010-02-10
Supplement: pone.0009144.s005.pdf [file pone.0009144.s005.pdf]

z5a1 -----MHHSARLCLFLLCVLSGTYGGKVLVPLDGSHWVNMKVLIEELHRKGNHTVVRPNSWYIKKESPFYSPITIPNTGGF---DEEFGSLLINR 91  
z5a2 -----MHSIHILGLFLLCLVLSRSYAGKLLVVPVEGSHWVNMKVLIVLHLSRGHSITVVRGSSWYIEEQSPLYTSITVDN-GEF---DDDFMEKFFPH 90  
z5a3 -----MHPSTHLGLFLLCLVLSRSYAGKLLVVPVEGSHWVNMKVLIVLHLSRGHSITVVRGSSWYIEEQSPLYTSITVDN-GEF---DDDFMEKFFPH 90  
z5a4 -----MHPSTHLGLFLLCLVLSRSYAGKLLVVPVEGSHWVNMKVLIVLHLSRGHSITVVRGSSWYIEEQSPLYTSITVDN-GEF---DDDFMEKFFPH 91  
z5a5 -----MPSLPLATLLAFLSILSLVFGGKVLVPLDGSHWVNMKVLIEELHTRGHNTVLRASNSWYIKKESPFYTSITVNSGGI---EKELFEFVSRN 90  
f5a1 -----MLRPTSLPLLLLICIVSVVNAAGKVLVFPDGSHWVNMKVLIEELHTRGHNTVLRASNSWYIKKESPFYTSITVNSGGI---EKELFEFVSRN 91  
f5a2 -----ML-----LQAVLLLYLTSVNVAGKVLVPLDGSHWVNMKVLIEELHARGHEVTVVRPDSWYIKAESYYKSIITLSSSAGF---DEEFGFLFATE 87  
f5a4 -----MLRPTSLPLLLLICIVSVVNAAGKVLVPLDGSHWVNMKVLIEELHARGHEVTVVRPADSWYIKAESYYKSIITLSSSAGF---DEEFGFLFVKE 91  
f5a5 -----MWPPLSPLLVALLFIQVPPVSSAGKILVFPDGSHWVNMKVLIEELHTRGHNTVLRASNSWYISQKSPFYRSVTLGSSNGF---EDN-METVYLVQ 93  
t5a1 -----MLPPTSLSLLLLLCCFSLVNGGKVLVFPDGSHWVNMKVLIEELHARGHEVTVLRPADSWYIKAESPHYKSIITLKSSAGV---DKEFLGVVTR 91  
t5a2 -----MLPPTSLSLLLLLCCFSLVNGGKVLVFPDGSHWVNMKVLIEELHARGHEVTVLRPADSWYIKAESPHYKSIITLKSSAGF---DEEFGFLFATE 91  
m5a1 -----MYRQTLVALAVFFVSSFLVNGGKVLVFPDGSHWVNMKVLIEELHARGHEVTVLRPADSWYIKPDSPHYKAITLNSPAGF---DSKFGSFFVTR 91  
s5a1 -----MYRPALAALAVLLCSSLVNGGKILVFPDGSHWVNMKVLIEELHARGHEVTVMRSSDSWYIKPESPHYRSITVNSAGF---DEEFGFLFVDT 91  
s5a2 -----MRALRSSLIIFALLVQLSS-SSWGKILVFPDGSHWVNMKVLIEELHARGHEVTVVRPDSWYITKESPFYTSITVNSAGF---NOKVFEAFLLR 93  
z5b1 -----MIGQTFQPCGQILIALLLVVPVTAQSEKVLVFPDGSHWVNMNVLVEALHAKGNHTVIRMSADSWYIKKESPHYTSINLKSAGGF---DEEFPFETFAFR 96  
z5b2 -----MNGQWQVWIPTITLTLVPSVPAQCGKVLVFPDGSHWVNMNVLVEALSAGKHDVTVMRTASWYIKKESPHYTSINLKSAGGF---NKEVLEQFASR 96  
z5b3 -----MNGKVFHMRWVPTLTLVPSVPAQCGKVLVFPDGSHWVNMNVLVEALHAKGNHTVIRMSADSWYIKKESPHYTSINLKSAGGF---NKEVLEQFASR 96  
z5b4 -----MNRKVLHMLWVPTLTLVPSVPAQCGKVLVFPDGSHWVNMNVLVEALHAKGNHTVIRMSADSWYIKKESPHYTSINLKSAGGF---NKEVLEQFASR 96  
f5b2 -----MQVLRW-LWMLDCLFCLTVVHGGKVLVFPDGSHWVNMNVLVEALHARGHQSIVVRSSDSWYIKKESPHYTSINLKSAGGF---DEEFPFETFAFR 90  
t5b3 -----MQRWLW-LWIDICVLCCTAVHGGKVLVFPDGSHWVNMNVLVEALHARGHQSIVVRSSDSWYIKKESQFYTSITLDSPSGF---DEDFITMVFAR 90  
t5b4 -----MQRWLW-LWIDICVLCCTAVHGGKVLVFPDGSHWVNMNVLVEALHARGHQSIVVRSSDSWYIKKESQFYTSITLDSPSGF---DEDFITMVFAR 90  
t5b5 -----MQRWLW-LWIDICVLCCTAVHGGKVLVFPDGSHWVNMNVLVEALHARGHQSIVVRSSDSWYIKKESQFYTSITLDRPTGF---DDDFITMVFAR 90  
z5c1 -----MAQLSKNTPSVSLWITVMIIFGSLCDGGKILVAPLEGSHWVNMNVLVEALHARGHQSIVVRSSDSWYIKKESQFYTSITLDRPTGF---DDDFITMVFAR 97  
z5c2 -----MTRVFNMMVSVSLWITVITIFGSLCDGGKILVAPLEGSHWVNMNVLVEALHARGHQSIVVRSSDSWYIKKESQFYTSITLDRPTGF---DDDFITMVFAR 97  
z5c3 -----MAPLFKNLCSVSLWITVITIFGSLCDGGKILVAPLEGSHWVNMNVLVEALHARGHQSIVVRSSDSWYIKKESQFYTSITLDRPTGF---DDDFITMVFAR 97  
f5c1 -----MSLQCKAAAFVFLVSSLLWGVSHGGKILVAPLEGSHWVNMNVLVEALHARGHQSIVVRSSDSWYIKKESQFYTSITLDRPTGF---DDDFITMVFAR 95  
f5c2 -----MRPIFFCSVSVLFFVAPRSCQGGNVLVPIEGSHWVNMKILLALHARGHNTIVRSSKSWYISENTYYKIVTVVVERSL---DORAITRIVSE 93  
m5c1 -----MISRRSSGVFLFFSIFCSWRIGQAGRILVFPDGSHWVNMNVLVEALHARGHQSIVVRSSDSWYIKKESQFYTSITLDRPTGF---DDDFITMVFAR 96  
m5c2 -----MISRRSSGVFLFFSIFCSWRIGQAGRILVFPDGSHWVNMNVLVEALHARGHQSIVVRSSDSWYIKKESQFYTSITLDRPTGF---DDDFITMVFAR 96  
m5c4 -----MISRRSSGVFLFFSIFCSWRIGQAGRILVFPDGSHWVNMNVLVEALHARGHQSIVVRSSDSWYIKKESQFYTSITLDRPTGF---DDDFITMVFAR 96  
m5c5 -----MK-LPLCCCALLVLLVTFCHGGNVLVPAEGSHWVNMNVLVEALHARGHQSIVVRSSDSWYIKKESQFYTSITLDRPTGF---DDDFITMVFAR 92  
m5c7 -----MK-LPLCCCALLVLLVTFCHGGNVLVPAEGSHWVNMNVLVEALHARGHQSIVVRSSDSWYIKKESQFYTSITLDRPTGF---DDDFITMVFAR 92  
s5c1 -----MPPNRYAT-SLLLSIVLLSWRICHGRKILIFPLEGSHWVNMNVLVEALHARGHQSIVVRSSDSWYIKKESQFYTSITLDRPTGF---DDDFITMVFAR 95  
s5c2 -----MR-LLYCSIVLLVTFCHGGNVLVPAEGSHWVNMNVLVEALHARGHQSIVVRSSDSWYIKKESQFYTSITLDRPTGF---DDDFITMVFAR 92  
z5d1 -----MKSFFSQSNVITGLFLALSAFLSCSGGKILVFPDGSHWVNMKILLALHARGHNTIVRSSKSWYISENTYYKIVTVVVERSL---DORAITRIVSE 97  
m5d1 -----MHQVCGVVFVFNLCFLHFLAPS CSGGNILVFPDGSHWVNMKILLALHARGHNTIVRSTSWYIKKESPIYSSITVEM-EEA---LEDFFDVVFKE 93  
z5d2 -----MYRVCGLLACFSLCLIFLVPSCSGGNILVFPDGSHWVNMKILLALHARGHNTIVRSTSWYIKKESPIYSSITVEM-EEA---LEDFFDVVFKE 93  
z5e1 -----MLLHPQISVLAFAIWSLPSLGLAGKILVFPDGSHWVNMNVLVEALHARGHQSIVVRSSDSWYIKKESQFYTSITLDRPTGF---DDDFITMVFAR 96  
f5e1 -----MASYPVLTFLVFFSAALSSTCQGGKVLVPLDGSHWVNMKILLALHARGHNTIVRSTSWYIKKESPIYSSITVEM-EEA---LEDFFDVVFKE 96  
t5e1 -----MASCALVLLVFFSAALSSTCQGGKVLVPLDGSHWVNMKILLALHARGHNTIVRSTSWYIKKESPIYSSITVEM-EEA---LEDFFDVVFKE 96  
t5e2 -----MASCALVLLVFFSAALSSTCQGGKVLVPLDGSHWVNMKILLALHARGHNTIVRSTSWYIKKESPIYSSITVEM-EEA---LEDFFDVVFKE 96  
m5e1 -----MASFPALMFFLLFTFLNCGCESGKVLVFPDGSHWVNMKILLALHARGHNTIVRSTSWYIKKESPIYSSITVEM-EEA---LEDFFDVVFKE 96  
m5e2 -----MASFPALMFFLLFTFLNCGCESGKVLVFPDGSHWVNMKILLALHARGHNTIVRSTSWYIKKESPIYSSITVEM-EEA---LEDFFDVVFKE 96  
s5e1 -----MESHAPALAFLLVFFSAALSSTCQGGKVLVPLDGSHWVNMKILLALHARGHNTIVRSTSWYIKKESPIYSSITVEM-EEA---LEDFFDVVFKE 96  
z5f1 -----MDIIFVVQIVVLSLTLPL-VHCGKILVFPHEGSHWVNMNVLVEALHARGHQSIVRALSWSYIPEPSPHYDSINVPFLGG---DDQFYHSPFIR 90  
f5f1 -----MFLLFATVICLPTSMIPEVLGGNVLVFPHEGSHWVNMNVLVEALHARGHNTIVRSTSWYIKKESPIYSSITVEM-EEA---LEDFFDVVFKE 91  
m5f1 -----MTM-LWVWTCFVWCVSVVHSGKVLVFPDGSHWVNMNVLVEALHARGHQSIVRALSWSYIPEPSPHYDSINVPFLGG---DDQFYHSPFIR 89  
m5f2 -----MTM-LWVWTCFVWCVSVVHSGKVLVFPDGSHWVNMNVLVEALHARGHQSIVRALSWSYIPEPSPHYDSINVPFLGG---DDQFYHSPFIR 89  
m5f4 -----MAMSLTIFCLVIVVPSQGGKILVFPDGSHWVNMKILLALHARGHNTIVRSTSWYIKKESPIYSSITVEM-EEA---LEDFFDVVFKE 91  
s5f1 -----MFLTLVSIIFLAGIIPAAVGGKVLVFPDGSHWVNMNVLVEALHARGHNTIVRSTSWYIKKESPIYSSITVEM-EEA---LEDFFDVVFKE 91  
z5g1 -----MDMSK---WLALCLLSVCCCHGGNVLVFPDGSHWVNMVILRKLHARGHNTIVRSTSWYIKKESPIYSSITVEM-EEA---LEDFFDVVFKE 95  
z5g2 -----MQGMS---LVFLWTLSSLVPSGNADKILVFPDGSHWVNMVILRKLHARGHNTIVRSTSWYIKKESPIYSSITVEM-EEA---LEDFFDVVFKE 95  
f5g1 -----MSRIIP---VFLAGLCLLLGPTLGSRRILVFPDGSHWVNMVILRKLHARGHNTIVRSTSWYIKKESPIYSSITVEM-EEA---LEDFFDVVFKE 95  
t5g1 -----MSRIIP---VFLAGLCLLLGPTLGSRRILVFPDGSHWVNMVILRKLHARGHNTIVRSTSWYIKKESPIYSSITVEM-EEA---LEDFFDVVFKE 95  
m5g1 -----MSPAVSGLLTVLGLLGLLGGSPCSSKILVFPDGSHWVNMKILLALHARGHNTIVRSTSWYIKKESPIYSSITVEM-EEA---LEDFFDVVFKE 97  
s5g1 -----MSGVIP---LFLAGLCLFLRPTCCGSRILVFPDGSHWVNMVILRKLHARGHNTIVRSTSWYIKKESPIYSSITVEM-EEA---LEDFFDVVFKE 95  
s5g2 -----MSGVIP---LFLAGLCLFLRPTCCGSRILVFPDGSHWVNMVILRKLHARGHNTIVRSTSWYIKKESPIYSSITVEM-EEA---LEDFFDVVFKE 95  
f5h1 -----MRGLSVAVSLVLLVGVSLIASPSVHGGKILVFPDGSHWVNMNVLVEALHARGHNTIVRSTSWYIKKESPIYSSITVEM-EEA---LEDFFDVVFKE 99  
t5h1 -----MGGISAGSLAILLVGSLIASPSVHGGKILVFPDGSHWVNMNVLVEALHARGHNTIVRSTSWYIKKESPIYSSITVEM-EEA---LEDFFDVVFKE 99  
s5h1 -----MGFNQGLVLLLASLTLGSGVLAGKILVFPDGSHWVNMNLLIQLHARGHNTIVRSTSWYIKKESPIYSSITVEM-EEA---LEDFFDVVFKE 97  
x5a1 -----MAPMRRMLCTSVFLCAAVLSVQAGKILVFPVEASHWVNMNVLVEALHARGHNTIVRSTSWYIKKESPIYSSITVEM-EEA---LEDFFDVVFKE 97

```

z5a1 LLEIKRGG-----YFVLRNVRLEFPIIMMKFKTMHEDMLQMDMRMLEDE-KVMNSIQDAKFDVVLADPAVGGGPIILAYKFNIPLVFNVRWTIQGEGHF 184
z5a2 LLKIQRQG-----KSPWNEALADEMIHFVTEIHKQSCNMTAILFKNE-TLMNSLKDAADVVLLTDPAYGSGVLLAHRLGLPLVYNVRWTYVGEAHF 183
z5a3 LLKIQRQG-----KSPWNEALADEMIHFVTEIHKQSCNMTAILFKNE-TLMNSLKDAADVVLLTDPAYGSGVLLAHRLGLPLVYNVRWTYVGEAHF 183
z5a4 LLKMQRQG-----KSPWNEALADEMIHFVTEIHKQSCNMTAILFKNE-TLMNSLKDAADVVLLTDPAYGSGVLLAHRLGLPLVYNVRWTYVGEAHF 184
z5a5 LLVIRRQK-----RSPWTKLKLVEVGAVFEMHRNQLNLMGNIFENK-DLMDSLQAKYDVLVLLTDPAYGGGFLLAYRLGLPLVYNVRWTMHGEAHF 183
f5a1 LLKMRREG-----ASLWSRLKLEVDLVELFRQIHKHIVEMVEMGFENT-QLMQILRDAKYDVLVLLTDPAGGGGVLLAHRLGLPLVFNVRWTIQGEGH 184
f5a2 LLAMRREG-----ASFWNLLTLEKMMETFSIMNNLVIQIAGEMFENT-QLMQSLHDAKYDVLVLLTDPAVPTGVLLAHRLGLPLVYNVRWTIQGEGH 180
f5a4 MLAMRREG-----ASLWSRLKLEVDLVELFRQIHKHIVEMVEMGFENT-QLMQILRDAKYDVLVLLTDPAGGGGVLLAHRLGLPLVFNVRWTIQGEGH 181
f5a5 QLEIRLAGRNASWSRFTNLQLRQVVHQFSQFHKGMSEMVTOQFEDT-KLMLSQEAQYDVLVLLTDPGGGGAILARRLQVPLIYNVRWTIQGEGHLL 192
t5a1 LLKMRREG-----ASLWSRLKLEVDLVELFRQIHKHIVEMVEMGFENT-QLMQSLRDAKYDVLVLLTDPAGGGGVLLAHRLGLPLVYNVRWTIQGEGH 184
t5a2 LLAMRREG-----ASLWNQISLEFKMMETFAEMIKLVQIAEEMFEDA-ELMQSLRDAKYDVLVLLTDPAVATGVLLAHRLGLPLVYNVRWTIQGEGH 184
m5a1 TLNMQRQG-----ASLWTRISLELDMLNMFNMNKLVLQMVVEEIFEDP-KLMQSLHDAKYDVLVLLTDPAGGGGVLLAHRLGLPLVYNVRWTIQGEGH 184
s5a1 MMNMRKRG-----ASLWARISLEFELVEKFFYQMNKEVIEVMGKMFENT-KLMQSLTDAKYDVLVLLTDPAGGAILARRLQVPLVFNVRWTIQGEGH 184
s5a2 QLEIRLQGRHGFSWSKIWTKIQIERLVVQFSQFHKGMSEIAVQMLEDE-NLMQSLFEAKYDVLVLLTDPGGVGMALARRLGLPLVFNVRWTIQGEGH 192
z5b1 LMKIVREG-----SRWGRKLEIETWQSYEMIEIESEMIKNMLEDQ-PLMQTFRDAKYDVLVLLTDPPLFGGVILGHFLKLPVYNVRWTMYNEAHFV 188
z5b2 TMHILRDG-----STWGHLLKQADMWQSFLLKIFAEEREMITNMIEDQ-QLMQLSLKDAKYDVLVLLTDPNMFGGVILGHYKLPVYNVRWYAGYNEAHF 188
z5b3 LMNLRREG-----STWGRVKELEIEMWQTSFKMIEIEREMITNMIEDQ-QLMQSLKDAKYDVLVLLTDPAMYGGVILGHYKLPVYNVRWTYVGEAHF 188
z5b4 LITILRDG-----STWGRLLKMEMWQSSLLKIMETEREMITNMIEDQ-QLMQLSLKDAKYDVLVLLTDPAMYGGVILGHYKLPVYNVRWYVGEAHF 188
f5b2 LLEIQREGK-----SPWTRCKLEIEQAETREMFKESEFVKMLLENK-DLMQSLKNTNFDVLVLLTDPVAPVGAAILANYLKLPLVFNVRWYVSHGEGH 183
z5b3 LLEIQREGK-----SPWTRCKLEIEQAETREMFKESEFVKMLLENK-DLMQSLKNTNFDVLVLLTDPVAPVGAAILANYLKLPLVFNVRWYVSHGEGH 183
t5b4 LLEIQREGK-----SPWTRCKLEIEQAETREMFKESEFVKMLLENK-DLMQSLKNTNFDVLVLLTDPVAPVGAAILANYLKLPLVFNVRWYVSHGEGH 183
t5b5 LLEIKREGK-----SLWTRCKLEIEQAETREMFKESEFVKMLLENK-DLMQSLKNTNFDVLVLLTDPVAPVGAAILANYLKLPLVFNVRWYVSHGEGH 183
z5c1 KIDYERGGK-----SWLGGVQLFLDVSKAVYVSHKLVCRILITNIFESE-DILKALQEKKYDLMVLLTDPGWGTGIIIAHKLKLPVYNVRWYVPEEGH 190
z5c2 MIKYEKKG-----SWLSIVRLYLNVFVAVKKTHEMVCQLITNIFLDE-ELIKMLNEKQYDLMVLLTDPVWGTGIIIAHKLKLPVYNVRWYVPEEGH 190
z5c3 VINERKGS-----SWSVTKLFFDSVIDNYEMTKMVCIDITTSIFESE-EILKTLQEKQYDLMVLLTDPVWGMGIIIAHKLKLPVYNVRWYVPEEGH 190
f5c1 IIDIRGERG-----PAWNFVSLQEMFTSMYMRHRLICQMAANFTDDR-NLMNLTLEKNDYDLALVDPAWGAGLMLAHALKLPLAYVYVWYVSHGEGH 188
f5c2 IQFERGAL-----PLTSFLHITFGMTSTFIDAHSAIGEFIAALDDQ-ELMRTLKKNKYDVLVLLTDPVWGSIIIAKYLNLPLVYNVRWYVSHGEGH 186
m5c1 IFAIERKGT-----SIMSFLSLLIEMFGTMMFDMGMCKMATMLEDK-ELMGVLRKKYDVLVLLTDPVWAGIIIAHALELPLVYNVRWYVSHGEGH 189
m5c2 VFAIERREKT-----SMMNFVLLIEMFRTMFMHGMCKMATMLEDK-ELMGVLRKKYDVLVLLTDPVWAGIIIAHALELPLVYNVRWYVSHGEGH 189
m5c4 IFAIERKGT-----SIMSFLSLLIEMFGTMMFDMGMCKMATMLEDK-ELMGVLRKKYDVLVLLTDPVWAGIIIAHALELPLVYNVRWYVSHGEGH 189
m5c5 FIHFORGAL-----PITSFLHMSLGMIGKLEAEPVGEFVTAAMNDK-ALMKTLENSKFDVLLTDPVWGGVILAKYLNLPLVFNVRWYVPEEGH 185
m5c7 FLQFERGAL-----PLTSFLSFSVGVIGVFFEAHSVAVCELVSAVDDA-ALMKTLENSKFDVLLTDPVWGGGAILAKYLNLPLVYNVRWYVPEEGH 185
s5c1 VIDIERGES-----VWVSFAEQAEEMFAMFNVRHIMCKMATMLEDK-DLMKTLKDRKYDVLVLLTDPVWAGIIIAHKLKLPVYNVRWYVSHGEGH 188
s5c2 ALEFERGAL-----PLANFHLHTVGMFTFVDAHAIVGCKLSAMLDDK-EFMRTLVKEGNFDMVLLTDPVWGHGIIIAKYLNLPLVYNVRWYVSHGEGH 185
z5d1 AMEIERGEG-----SGLAFLLKQYDLFSLMSTAHEIAECKMVSILEDK-MLVKKLQEQYDLMVLLTDPVWAGIIIAHKLKLPVYNVRWYVSHGEGH 190
m5d1 QIRVOREGA-----SLSFFRLRHKDFISMMSSHAHALRCAATKHIFENK-NLVKQIIDSDFVLLTDPVWAGIIIAHKLKLPVYNVRWYVSHGEGH 186
m5d2 QIKVOREGA-----SMLSFFKLNKDFLSMLTQAHVLCVDTKIDIFENE-DLAKQITDSKYDVLVLLTDPVWAGIIIAHKLKLPVYNVRWYVSHGEGH 186
z5e1 NIDIQRGKG-----SIWSFLALQKEIITLLESRSRSTAEAMRVVLEDE-ELIKTLKESKYDLMVLLTDPVWAGIIIAHKLKLPVYNVRWYVSHGEGH 189
f5e1 SIEIRRRREG-----SLWAFEFYQNLFNMLESSQDQVAKMVIDIFENE-TLIMKLLKTEYDFMLLDPVWGGVILAHYLLQPLVLSARWAFSGEASH 189
t5e1 SIDIRRRREG-----SLRGFFEYQNLVTFLEQSQDQVAKMVIDIFENK-TLSTKLKETNDFVLLTDPVWAGIIIAHKLKLPVYNVRWYVSHGEGH 189
t5e2 SIDIRRRREG-----SLRGFFEYQNLVTFLEQSQDQVAKMVIDIFENK-TLIRNLKDEYDFVLLTDPVWAGIIIAHKLKLPVYNVRWYVSHGEGH 189
m5e1 LLEGRQYQG-----TLWGLFEFYRNFSKLLKENQQLVANLAASIMENK-TLVKELNQTKYDVLVLLTDPVWAGIIIAHKLKLPVYNVRWYVSHGEGH 189
m5e2 TLEDROYQG-----TLWGLFEFYRNFFNLIQGNQVAVANLAASIMENK-TLVKELNQTKYDVLVLLTDPVWAGIIIAHKLKLPVYNVRWYVSHGEGH 189
s5e1 SIEIRRNKG-----TLWAFVKFYNNLFDMMGNHKKVAVKLIVSIFENK-TLIAELKREAGYDFVLLTDPVWAGIIIAHKLKLPVYNVRWYVSHGEGH 189
z5f1 QLQIRREQR-----WTRFKLDMELKKEKFSEMHRKICEMVIHIVEKEPAIMKQIKKANFDIMLTDPAANGGGVLLARYLHLPLVFNVRWYVSHGEGH 182
f5f1 VVKIKRRHQG-----NAWSRFGLDSELKNNFYELHRKICEAIVHMFENE-DLMSFQDSKFDIVLTDPAANGGGVLLAHRLGLPLVFNVRWYVSHGEGH 184
m5f1 NIEIKRRRN-----PAWLRFLOEIEHFQFLEFHKICTLIERIFENQ-ELMQLLKNTNFDLILTDPAIPGGAILAHYLLKLPVFNVRWYVSHGEGH 182
m5f2 NIEIKRRRN-----PAWLRFLOEIEHFQFLEFHKICTLIERIFENQ-ELMQLLKNTNFDLILTDPAIPGGAILAHYLLKLPVFNVRWYVSHGEGH 182
m5f4 VIKIKRSKA-----SAWAQFSLNMVLDKGFHSFHEKVGEMIVCFMENA-TLMRSLQEAQYDVLVLLTDPNGGGVFLAHYLLSPLVNLARWYVSHGEGH 184
s5f1 VIKIKRSKS-----SAWARFALDMLKDKFFELHKKICEVVTNIFENK-ELMKSFRDSKFDVLLTDPVWAGIIIAHKLKLPVFNVRWYVSHGEGH 184
z5g1 SLALQKMS-----LVRFFEQKQDITVVKVFNGLVLRMVSAMLLDA-ELVKSLEAKYDVLVLLTDPVWAGIIIAHKLKLPVFNVRWYVSHGEGH 187
z5g2 ILDARRDGP-----IMGVLAQMSFEIILKVGHGANIAMLTSMLLENK-VLMSQIKMANYDMLTDPAMPGGVILAHYLLHLPVYNVRWYVSHGEGH 187
f5g1 VMECRSGSE-----FLRSFCQQLHLSMLDKGKILASAAATMLDDP-KFMKLLTDAKFDLMLTDPGLTIQVVLGSYKLPVFNVRWYVSHGEGH 187
t5g1 VIECRSSGQ-----FLRSFCQQLHLSMFMKNGHKILANASAMLLDNL-KFMKLLRDAKFDLMLTDPALTIQVVLGSYKLPVFNVRWYVSHGEGH 187
m5g1 VLDCRRHPS-----FIRTFQEQVMTAFASNGHRILARAATTIIEQD-ALMKKIRDTEFDLMLTDPALPLGVVLLGGYKLPVFNVRWYVSHGEGH 189
s5g1 AMECRDFQP-----SIGTFQEQHLISLLGNGHEILARSAAMLLDDP-VFMKLLHDAKYDLMVLLTDPAMTLGVILGSYKLPVFNVRWYVSHGEGH 187
s5g2 VMECRSPH-----FISTFCQQLNVLSMLGKGEILARSAAMLLDDP-VFMKLLHDAKYDLMVLLTDPALTLGVILGSYKLPVFNVRWYVSHGEGH 187
f5h1 MLKIQKDDG-----ALS-FVRFYVWVLLTSLVHQQASMMGVEIFKKN-TLLQSLHDTFEDVLLTDPGLVGVVLAHELKLPVFNVRWYVSHGEGH 191
z5h1 MLTIQKAGG-----ALS-FVRFYVWVLAALSRIHRQASLMGVEIFKKN-TLLQSLRNTQFDVLLTDPGLVGVVLAHELKLPVFNVRWYVSHGEGH 191
s5h1 MLAIHKEGA-----SISGFVKFYVEMLGTLSNIHRQASLVAEMFENK-TLMQSLRNTQFDVLLTDPGLVGVVLAHELKLPVFNVRWYVSHGEGH 190
x5a1 VFTIALSKH-----SSPFLSANFIQTQVGTQIVSVAVSALFENN-NIMNELRNTQFDVLLADPVNIAQPMPLAHHLKLPVFNVRWYVSHGEGH 188

```

:\*\*\* \*.:\* \* \* : : \* . : \*::\*: : \* :::\*\*\* \*\* \* \*\* : ..

z5a1 APPSLSYIPVPGVELTDKMSFLORVKNVLIYLFISQIQMOMVEPIYAFCHKHFGNVTVFSLFQADADLWLMRNDFTFEFPRPTMPNVIYMSGFOCKPAK 284

z5a2 APPSLSYVVPVSGLOLTDKMTFSQRVMNMMTYIMIRYKYSKNFGSPYQELTQKYFGPNVNFSSLLQADADLWLMRNDFTFEFPRPTMPNVIYMSGFOCKPAK 283

z5a3 APPSLSYVVPVSGLOLTDKMTFSQRVMNMMTYIMIRYKYSKNFGSPYQELAQKYFGPNVNFSSLLQADADLWLMRNDFTFEFPRPTMPNVIYMSGFOCKPAK 283

z5a4 APPSLSYVVPVSGLOLTDKMTFSQRVMNMMTYIMILYKNFKYFGSPYQELTQKYFGPNVNFSSLLQADADLWLMRNDFTFEFPRPTMPNVIYMSGFOCKPAK 284

z5a5 APPSLSYIPIVPGLELTDKMTFVQRVONILVYMFSKFQKARVSKHYRSFCEKYFGSEINVKAILQADADLWLMRNDFTFEFPRPTMPNVIYMSGFOCKPSPK 283

f5a1 APPSLSYVPMAMSSELTDQMTFFORVKNILVFLVLSQLRIKYLADPNYRPFVHRVYFGDDVHYMELFQAADLWLMRNDFTFEFPRPTMPNVIYMSGFOCKPSPK 284

f5a2 APPSLSYVPIAMSSELTDQMTFFORVKNILYFLNFQFKIWNFIDPILITFVHRVYFGDDVHYMELFQAADLWLMRNDFTFEFPRPTMPNVIYMSGFOCKPSPK 280

f5a4 APPSLSYVPIPGSELTDQMTFFORVONIMYFFSCWQIWFVDNPNRPFVHRVYFGDDVHYMELFQAADLWLMRNDFTFEFPRPTMPNVIYMSGFOCKPSPK 281

f5a5 APPSLSYVPTAAELTDKMTFFORIKNLLSYILGMVTMSSITEPCYKPLVEKYFGPDVDSYTFFLDADLWLMRNDFTFEFPRPTMPNVIYMSGFOCKPAK 292

t5a1 APPSLSYVPKAMSSELTDKMTFFORVKNVLFVFLVTLQRIKYLADPNYRPFVHRVYFGDDVHYMELFQAADLWLMRNDFTFEFPRPTMPNVIYMSGFOCKPSPK 284

t5a2 APPSLSYVPMAMSSELTDKMTFFORVKNILYFLNFQFKIWNFIDPILITFVHRVYFGDDVHYMELFQAADLWLMRNDFTFEFPRPTMPNVIYMSGFOCKPSPK 284

m5a1 APPSLSYVPIPGSELTDKMTFFORIKNLLSYILGMVTMSSITEPCYKPLVEKYFGPDVDSYTFFLDADLWLMRNDFTFEFPRPTMPNVIYMSGFOCKPSPK 284

s5a1 APPSLSYVPIPGSELTDKMTFFORIKNLLSYILGMVTMSSITEPCYKPLVEKYFGPDVDSYTFFLDADLWLMRNDFTFEFPRPTMPNVIYMSGFOCKPSPK 284

s5a2 APPSLSYVPIPGSELTDKMTFFORIKNLLSYILGMVTMSSITEPCYKPLVEKYFGPDVDSYTFFLDADLWLMRNDFTFEFPRPTMPNVIYMSGFOCKPSPK 292

z5b1 APPSLSYVPMFMMVES-DRMSFFORVKNVVMFTVAEAQAALLFAPYYNALCEQFIGPGVVSFLSLVQADLWLMRNDFTFEFPRPTMPNVIYMSGFOCKPSPK 287

z5b2 APPSLSYVPMFMMVES-DRMSFFORVKNVVMFTVAEAQAALLFAPYYNALCEQFIGPGVVSFLSLVQADLWLMRNDFTFEFPRPTMPNVIYMSGFOCKPSPK 288

z5b3 APPSLSYVPMFMMVES-DRMSFFORVKNVVMFTVAEAQAALLFAPYYNALCEQFIGPGVVSFLSLVQADLWLMRNDFTFEFPRPTMPNVIYMSGFOCKPSPK 288

z5b4 APPSLSYVPMFMMVES-DRMSFFORVKNVVMFTVAEAQAALLFAPYYNALCEQFIGPGVVSFLSLVQADLWLMRNDFTFEFPRPTMPNVIYMSGFOCKPSPK 288

f5b2 APPSISYIPLTGSQDQMSFFERLQNVLMFGLQYQIHWVAPAFEGELIKKYFGPDVDSYTFFLDADLWLMRNDFTFEFPRPTMPNVIYMSGFOCKPSPK 283

t5b3 APPSLSYVPIPLTGSQDQMSFFERLQNVLMFGLQYQIHWVAPAFEGELIKKYFGPDVDSYTFFLDADLWLMRNDFTFEFPRPTMPNVIYMSGFOCKPSPK 283

t5b4 APPSLSYVPIPLTGSQDQMSFFERLQNVLMFGLQYQIHWVAPAFEGELIKKYFGPDVDSYTFFLDADLWLMRNDFTFEFPRPTMPNVIYMSGFOCKPSPK 283

t5b5 APPSLSYVPIPLTGSQDQMSFFERLQNVLMFGLQYQIHWVAPAFEGELIKKYFGPDVDSYTFFLDADLWLMRNDFTFEFPRPTMPNVIYMSGFOCKPSPK 283

z5c1 APPSMSYIPLTGSQDQMSFFERLQNVLMFGLQYQIHWVAPAFEGELIKKYFGPDVDSYTFFLDADLWLMRNDFTFEFPRPTMPNVIYMSGFOCKPSPK 290

z5c2 APPSMSYIPLTGSQDQMSFFERLQNVLMFGLQYQIHWVAPAFEGELIKKYFGPDVDSYTFFLDADLWLMRNDFTFEFPRPTMPNVIYMSGFOCKPSPK 290

z5c3 APPSMSYIPLTGSQDQMSFFERLQNVLMFGLQYQIHWVAPAFEGELIKKYFGPDVDSYTFFLDADLWLMRNDFTFEFPRPTMPNVIYMSGFOCKPSPK 290

f5c1 APPSLSHIPVIGSGLSDIMTFSQRVKNLFFYMLWEAQNLFILQYQAVCDHFFGPEVRYSELIQADLWLMRNDFTFEFPRPTMPNVIYMSGFOCKPSPK 288

f5c2 APPSISYIPIPLTGSQDQMSFFERLQNVLMFGLQYQIHWVAPAFEGELIKKYFGPDVDSYTFFLDADLWLMRNDFTFEFPRPTMPNVIYMSGFOCKPSPK 285

m5c1 APPSLSYIPMTSGLTDMKMTFQRVKNLFFYALWEIQDMLFICQYQVTCDFGFGPNVKNHLLQADLWLMRNDFTFEFPRPTMPNVIYMSGFOCKPSPK 289

m5c2 APPSLSYIPMTSGLTDMKMTFQRVKNLFFYALWEIQDMLFICQYQVTCDFGFGPNVKNHLLQADLWLMRNDFTFEFPRPTMPNVIYMSGFOCKPSPK 289

m5c4 APPSLSYIPMTSGLTDMKMTFQRVKNLFFYALWEIQDMLFICQYQVTCDFGFGPNVKNHLLQADLWLMRNDFTFEFPRPTMPNVIYMSGFOCKPSPK 289

m5c5 APPSLSYVPIVSGSNTDRMNFQRVKNMFLYLVTQLQSYTAVNVYVQPCIDKFLGPDHDFNRLVLDADLWLMRNDFTFEFPRPTMPNVIYMSGFOCKPSPK 285

m5c7 APPSLSYVPIVSGSNTDRMNFQRVKNMFLYLVTQLQSYTAVNVYVQPCIDKFLGPDHDFNRLVLDADLWLMRNDFTFEFPRPTMPNVIYMSGFOCKPSPK 285

s5c1 APPSLSYIPLTGSGLSDIMTFSQRVKNLFFYMLWEAQNLFILQYQAVCDHFFGPEVRYSELIQADLWLMRNDFTFEFPRPTMPNVIYMSGFOCKPSPK 288

s5c2 APPSLSYIPLTGSGLSDIMTFSQRVKNLFFYMLWEAQNLFILQYQAVCDHFFGPEVRYSELIQADLWLMRNDFTFEFPRPTMPNVIYMSGFOCKPSPK 285

z5d1 APPSMSYIPLTGSGLSDIMTFSQRVKNLFFYMLWEAQNLFILQYQAVCDHFFGPEVRYSELIQADLWLMRNDFTFEFPRPTMPNVIYMSGFOCKPSPK 290

m5d1 APPSLSYIPLTGSGLSDIMTFSQRVKNLFFYMLWEAQNLFILQYQAVCDHFFGPEVRYSELIQADLWLMRNDFTFEFPRPTMPNVIYMSGFOCKPSPK 286

m5d2 APPSLSYIPLTGSGLSDIMTFSQRVKNLFFYMLWEAQNLFILQYQAVCDHFFGPEVRYSELIQADLWLMRNDFTFEFPRPTMPNVIYMSGFOCKPSPK 286

z5e1 APPSLSYIPIPLTGSGLSDIMTFSQRVKNLFFYMLWEAQNLFILQYQAVCDHFFGPEVRYSELIQADLWLMRNDFTFEFPRPTMPNVIYMSGFOCKPSPK 289

f5e1 APPSLSYVPOVLSYNSDKMDFQRVKNVISHMLLIYMHYFVNPPYQAVCDKYFGADVNVMMLQADLWLMRNDFTFEFPRPTMPNVIYMSGFOCKPSPK 289

t5e1 APPSLSYVPOVLSYNSDKMDFQRVKNVISHMLLIYMHYFVNPPYQAVCDKYFGADVNVMMLQADLWLMRNDFTFEFPRPTMPNVIYMSGFOCKPSPK 289

t5e2 APPSLSYVPOVLSYNSDKMDFQRVKNVISHMLLIYMHYFVNPPYQAVCDKYFGADVNVMMLQADLWLMRNDFTFEFPRPTMPNVIYMSGFOCKPSPK 289

m5e1 APPSLSYIPLTGSGLSDIMTFSQRVKNLFFYMLWEAQNLFILQYQAVCDHFFGPEVRYSELIQADLWLMRNDFTFEFPRPTMPNVIYMSGFOCKPSPK 289

m5e2 APPSLSYIPLTGSGLSDIMTFSQRVKNLFFYMLWEAQNLFILQYQAVCDHFFGPEVRYSELIQADLWLMRNDFTFEFPRPTMPNVIYMSGFOCKPSPK 289

s5e1 APPSLSYVPHLFDNSDKMDFQRVKNVISHMLLIYMHYFVNPPYQAVCDKYFGADVNVMMLQADLWLMRNDFTFEFPRPTMPNVIYMSGFOCKPSPK 289

z5f1 APPSLSYVPPVPSGLTDRMDFQRVKNVISHMLLIYMHYFVNPPYQAVCDKYFGADVNVMMLQADLWLMRNDFTFEFPRPTMPNVIYMSGFOCKPSPK 282

f5f1 APPSLSYVPLPSSSELTDQMTFFERVKNVYFYIMRMHLYKQIVAPHYSALSRRYFGPDADYFSLFQAADLWLMRNDFTFEFPRPTMPNVIYMSGFOCKPSPK 284

m5f1 APPSLSYIPIVPG-IEFSDKMSFFHRVINLVFFYFGQHSFEKMITPHYQDFMCKYFGPDVDFYSMFGQAADLWLMRNDFTFEFPRPTMPNVIYMSGFOCKPSPK 281

m5f2 APPSLSYIPIVPG-IEFSDKMSFFHRVINLVFFYFGQHSFEKMITPHYQDFMCKYFGPDVDFYSMFGQAADLWLMRNDFTFEFPRPTMPNVIYMSGFOCKPSPK 281

m5f4 APPSLSYVPLPSSSELTDQMTFFERVKNVYFYIMRMHLYKQIVAPHYSALSRRYFGPDADYFSLFQAADLWLMRNDFTFEFPRPTMPNVIYMSGFOCKPSPK 284

s5f1 APPSLSYVPLPSSSELTDQMTFFERVKNVYFYIMRMHLYKQIVAPHYSALSRRYFGPDADYFSLFQAADLWLMRNDFTFEFPRPTMPNVIYMSGFOCKPSPK 284

z5g1 APPSPPSYVPMYNSLLHDQMSFLORVENFLRYLCSLLQERVIVPIYRELLERHFFPGSDLLSMQASADLWLMRNDFTFEFPRPTMPNVIYMSGFOCKPSPK 287

z5g2 APPSISYVPPVPSGLTDRMDFQRVKNVISHMLLIYMHYFVNPPYQAVCDKYFGADVNVMMLQADLWLMRNDFTFEFPRPTMPNVIYMSGFOCKPSPK 287

f5g1 APPSLSYVPPVPSGLTDRMDFQRVKNVISHMLLIYMHYFVNPPYQAVCDKYFGADVNVMMLQADLWLMRNDFTFEFPRPTMPNVIYMSGFOCKPSPK 287

t5g1 APPSLSYVPPVPSGLTDRMDFQRVKNVISHMLLIYMHYFVNPPYQAVCDKYFGADVNVMMLQADLWLMRNDFTFEFPRPTMPNVIYMSGFOCKPSPK 287

m5g1 APPSLSYVPIVSGSNTDRMNFQRVKNMFLYLVTQLQSYTAVNVYVQPCIDKFLGPDHDFNRLVLDADLWLMRNDFTFEFPRPTMPNVIYMSGFOCKPSPK 289

s5g1 APPSLSYVPPVPSGLTDRMDFQRVKNVISHMLLIYMHYFVNPPYQAVCDKYFGADVNVMMLQADLWLMRNDFTFEFPRPTMPNVIYMSGFOCKPSPK 287

s5g2 APPSLSYVPPVPSGLTDRMDFQRVKNVISHMLLIYMHYFVNPPYQAVCDKYFGADVNVMMLQADLWLMRNDFTFEFPRPTMPNVIYMSGFOCKPSPK 287

f5h1 APPSLSYVPIVSGSNTDRMNFQRVKNMFLYLVTQLQSYTAVNVYVQPCIDKFLGPDHDFNRLVLDADLWLMRNDFTFEFPRPTMPNVIYMSGFOCKPSPK 291

t5h1 APPSLSYVPPVPSGLTDRMDFQRVKNVISHMLLIYMHYFVNPPYQAVCDKYFGADVNVMMLQADLWLMRNDFTFEFPRPTMPNVIYMSGFOCKPSPK 291

s5h1 APPSLSYVPIVSGSNTDRMNFQRVKNMFLYLVTQLQSYTAVNVYVQPCIDKFLGPDHDFNRLVLDADLWLMRNDFTFEFPRPTMPNVIYMSGFOCKPSPK 290

x5a1 APPSLSYVPIVSGSNTDRMNFQRVKNMFLYLVTQLQSYTAVNVYVQPCIDKFLGPDHDFNRLVLDADLWLMRNDFTFEFPRPTMPNVIYMSGFOCKPSPK 288





```

* * :
z5a1 SWIEYHSIDVILTLMLVTLGFVFAVLIAYTIKYFCL-CVFRKK---VKRE----- 525
z5a2 SWIEYQSIDVILTLMLMVLVFLVLLIVYTMKYFCL-CLFRKK---VKRE----- 524
z5a3 SWIEYQSIDVILTLMLMVLVFLVLIAYTIKYFCL-CLFRKK---VKHE----- 524
z5a4 SWIEYQSIDVILTLMLMVLVFLVLIAYTIKYFCL-RLFRKK---VKRE----- 525
z5a5 SWIEYHSIDVILTLMLLVLVFCVLIYSIVKCI CLKVVLKKK---VKTE----- 525
f5a1 NAIQYHSIDVLAFLVTLVLLIVAVFTSAVKFLWRRFLCRSK---VKKE----- 526
f5a2 NAIQYHSIDVLAFLVTLVLLIVLVFTSAVKFLWRRFLCRSK---VKKE----- 522
f5a4 NAIQYHSIDVLAFLVTLVLLIVAVFTSAVKFLWRRFLCRSK---VKKE----- 523
f5a5 SWFTYHSLDVIAALSSTAALLLVVICISALRCVWKILFR-TK---VKHE----- 533
t5a1 SAIQYHSIDVLAFLVTLVLLIVAVFTSAVKFLWRRFLGRSK---VKRE----- 526
t5a2 SAIQYHSIDVLAFLVTLVLLIVAVFTSAVKFLWRRFLGRSK---VKKE----- 526
m5a1 TMIQYYSMDVAFLFATVLLFLLVFSFAVKFLIRQIFDRSK---VKKE----- 526
s5a1 STIQYHSIDVVAFLVAVLLVFAVFCVAVMFLWRRVFSGSK---VKKE----- 526
s5a2 SWFVYKSLDVIAALLAVLLVFTFCISIAGLLWRIILVGGK---VKHE----- 534
z5b1 PWYSYHSVDVILVLIASVSLIILTIYAVIRYFCCGICMRRT---KVKLQ----- 530
z5b2 LWYSYHSVDVILVLIASVSLIILSIYAVIRYFCCRICMRKT---KIKHE----- 531
z5b3 PWYSYHSVDVILVLIASVSLIILSIYAVIRYFCCRICMRRT---KNKRE----- 531
z5b4 PWYSYHSVDVILVLIASVSLIILTIYAVIRYFCCGICMRKT---KIKRQ----- 531
f5b2 PWYSYHSVDVMLFFAGITLLIFMTPAALARCLCSRCVRAKS---KLD----- 524
t5b3 PWYSYHSVDVFLTAIVLLIILTIITVFKYLF TKVCKRKY---KHD----- 524
t5b4 PWYSYHSVDVFLTAIVLLIILTIITVFKYLF TKVCKSKV---KHD----- 524
t5b5 PWYSYHSVDVMLFLAGITLVI SMIFVALIRCCRRCKTKS---KHD----- 524
z5c1 PWYSYHSVDVSVTLIAVVLIPIYSMFVTVRYLCKICCSRRK---KTE----- 531
z5c2 PWYSYHSVDVVLFAVLLIITVYCFVTVRYLCKVCKCSRRK---KTE----- 531
z5c3 PWYSYHSVDVAVTLIAVVLIPIFISIFVYVRYVICICCSRRK---KTE----- 531
f5c1 PWYSYHSVDVFLTAGAVLLIILACTTMRIRCLTKICKRKY---KNE----- 530
f5c2 PWYSYHSVDVMLFLAGITLLIFMTPAALARCLCSRCVRAKS---KQE----- 527
m5c1 PWYSYYSVDVVAFSFAVAAFIYFSLFAPLRWICFRKCLRRE---KQLSTNKIGSHQAGLKE 547
m5c2 PWYSYYSVDVVAFSFAVAAFIYFSLFAPLRWICFRKCLRRE---KQLSTNKIGSHQAGLKE 547
m5c4 PWYSYYSVDVVAFSFAVAAFIYFSLFAPLRWICFRKCLRRE---KQLSANKIGSHKIGLKE 547
m5c5 SWFYSYHSADVFLTAAVLLVFLTGFVFI RCLFRAVCKCKV---KHE----- 527
m5c7 SWFYSYHSVDVFLTAAVLLVFLTGFVFI RCLFRAVCKHKV---KYE----- 527
s5c1 PWYSYHSVDVMLF-LLTAVVALLFVAGLLWCFRGLCKRK---VKLD----- 530
s5c2 PWYSYHSVDVFLAAAGLLVLLTIFLLIRCLCTAMCKHKM---KRD----- 527
z5d1 PWYSYHSVDVFLVLFIVAACMLSIAVIRYVCYKICRRK---SKSE----- 532
m5d1 PWYSYHSFDVLLVLAVENTLLYAIYAVFRFLCRRKRRTK---TKQN----- 528
m5d2 PWYSYHSLDVLLLLAVGAVLLYSIYGVFRFLCRRKIKTK---TKLN----- 528
z5e1 PWYSYHCLDVLALIMSLCTAAGLLIILISRALLRACVRKIK---AKKE----- 532
f5e1 PWYAYHCLDVMAVFAAYGLIILMSLVVWSCRCVIRALIRATK---SPAKSKKE----- 536
t5e1 PWYAYHCLDVMAAFAALGLVVMALAWLLCRRVFRALTAGAK---KKSVMKSKKE----- 538
t5e2 PWYAYHCLDVMAAFAALGLVVMALAWLLCRRVFRALTAGPKN---SKSV----- 533
m5e1 PWYAYQCLDVMAVFGAVGLFIFTFIWNSCRCMFRCLTIMKK---SKVE----- 532
m5e2 PWYAYQCLDVMAVFGAVGLFIFTFIWISCRCMFRCLIRMKK---SKVE----- 532
s5e1 PWYAYHCLDVMAVFLFAVLTALVWVSPRCLIKRRLIRTK---TTAKSKHD----- 536
z5f1 PWYSYHSVDVGVFLVSVLFCIVFVLFKIVRCLCCRFCAKRN---RAKQD----- 525
f5f1 PWYSYHSVDVLLFLIAVVFLVLLGFVVLV-WSCFRPCVKR---KEKSD----- 525
m5f1 PWYSYHSVDVIMFLAAAVLLLFSIFGFV-WFCFRLCVOR---KQKCD----- 522
m5f2 PWYSYHSVDVIVFLAAAVLLLFSIFGFV-WFCFRLCVOR---KQKCE----- 522
m5f4 PWYSYHSVDVIVFLAAAVLLLFSIFGFV-WFCFRLCVOR---KQKCD----- 525
s5f1 PWYSYHSVDVMLFLLAIVVALLFIAALL-WSCFRLCCKR---KVKLD----- 525
z5g1 AWYSYHSLDVLVFLLAIAVIAFWTGVVYVCRFVCCRKSIKK---RKVD----- 528
z5g2 SEFSYCLDVVALVLFMLLGLGGVYITICKRRPKRQENKTGGDWNKGLK--- 534
f5g1 PWYTYSLDVALAISAVIAACAFAVVICRVLCCRKSRRK---TKAD----- 528
t5g1 PWYTYHSLDVAAVATAVIGACVWVVFICRVLVRRMSRRK---AKSD----- 528
m5g1 PWYSYFCLDVAAFFVITISGAFIWWVSVCRFLCCRKSRRK---TKAE----- 530
s5g1 PWYSYFCLDVAVLFGALIWFIWASVVVKILCCRGRRRK---IKA----- 528
s5g2 PWYSYFCLDIAVLFGALIGVFWASVVVCKILCCRGRRRK---IKA----- 528
f5h1 PWYSYHSVDVGGFALAVAFMMIVFVVGSLKFLCFSRKK-KS---KQD----- 531
t5h1 PWYSYHSVDVGLVLA VVGLAGFVVGSKFLCFSRKKNKS---KISDIR----- 535
s5h1 PWYAYYSVDVICFLVAVLLMLTAVIVGSRFVCFRCLRRRK---TKKE----- 532
x5a1 PWYQYLLDVIAFLAFIAIICISLLYKFLKAI FRKCCSRK---KNKRD----- 531

```
